# Supplementary material
Source: PubMed Central journal article supplement (PMC5851287)
Supplement: NIHMS942770-supplement-Supp_FIles.pdf [file NIHMS942770-supplement-Supp_FIles.pdf]

**Supplementary Table S1. Characteristics of the biomarker assays used for the FNIH OA Biomarkers Consortium sample measurements.**

| <b>Biomarker</b> | <b>Biomarker Stability</b>                                               | <b>US Status</b> | <b>Assay Type</b>              | <b>Starting Dilution (volume required for duplicate analyses)</b> | <b>LLOQ*</b> | <b>Lowest reported value (number of extreme outliers)</b> | <b>Control Ranges</b>                                        |
|------------------|--------------------------------------------------------------------------|------------------|--------------------------------|-------------------------------------------------------------------|--------------|-----------------------------------------------------------|--------------------------------------------------------------|
| serum C1,2C      | Unknown                                                                  | RUO              | C-I                            | 1:2 (50 µl)                                                       | 0.03 µg/ml   | <0.06 µg/ml<br>(0 (0))                                    | LQC: 0.038-0.132 µg/mL<br>HQC: 0.676-1.096 µg/mL             |
| serum C2C-HUSA   | Unknown                                                                  | RUO              | C-I                            | 1:2 (50 µl)                                                       | 10 ng/ml     | <20 ng/mL<br>(3 (1))                                      | LQC: 12-46 ng/mL<br>HQC: 213-400 ng/mL                       |
| serum Coll2-1NO2 | Unknown                                                                  | RUO              | C-I                            | 1:2 (50 µl)                                                       | 0.469 nM     | <0.9375 nM<br>(5 (2))                                     | LQC: 1.5-4.5 nM<br>HQC: 10-20 nM                             |
| serum CPII       | Maybe up to 1X freeze/thaw cycles                                        | RUO              | C-I                            | 1:2 (50 µl)                                                       | 50 ng/ml     | <100 ng/mL<br>(6 (3))                                     | LQC: 170-334 ng/mL<br>HQC: 942-1464 ng/mL                    |
| serum CS846      | Unknown                                                                  | RUO              | C-I                            | 1:5 (20 µl)                                                       | 20 ng/ml     | <100 ng/mL<br>(8 (4))                                     | LQC: 17-46 ng/mL<br>HQC: 215-355 ng/mL                       |
| serum CTX-1      | Up to 7X freeze/thaw cycles                                              | IVD              | C-I                            | Neat (100 µl)                                                     | 0.149 ng/ml  | <0.149 ng/mL<br>(0 (0))                                   | LQC: 0.244-0.366 ng/mL<br>HQC: 0.787-1.181 ng/mL             |
| serum COMP       | Up to 5X; stable at least 7 days at 4°C                                  | RUO              | Sandwich ELISA                 | 1:50 (4 µl)                                                       | 4 ng/ml      | <200 ng/mL<br>(2 (2))                                     | LQC: 10.4-15.6 ng/mL<br>HQC: 37.0-55.6 ng/mL                 |
| serum HA         | Up to 8X freeze/thaw cycles                                              | RUO              | Sandwich protein binding assay | 1:11 (19-30 µl)                                                   | 50 ng/ml     | <50 ng/mL<br>(7 (4))                                      | LQC: 33-61 ng/mL<br>MQC: 145-242 ng/mL<br>HQC: 352-586 ng/mL |
| serum MMP-3      | Unknown but analogous assay suggests up to at least 5 freeze thaw cycles | RUO              | Sandwich ELISA                 | 1:5 (20 µl)                                                       | 0.62 ng/ml   | <3.10 ng/mL<br>(10 (7))                                   | LQC: N/A ng/mL<br>MQC: N/A ng/mL<br>HQC: N/A ng/mL           |
| serum NTXI       | Up to 3X freeze/thaw cycles                                              | IVD              | C-I                            | 1:5 (20 µl)                                                       | 5 nM BCE     | <5 nM BCE<br>(2 (1))                                      | LQC: 6.7-11.3 nm BCE<br>HQC: 24.0-29.2 nm BCE                |
| serum PIIANP     | Manufacturer to provide data                                             | RUO              | C-I                            | 1:2 (20 µl)                                                       | 33 ng/ml     | <66 ng/mL<br>(0 (0))                                      | LQC: 42-95 ng/mL<br>HQC: 351-730 ng/mL                       |
| urine Col-2-1NO2 | Manufacturer to provide data                                             | RUO              | C-I                            | 1:2 (50 µl)                                                       | 0.0625 nM    | <0.0625 nM<br>(8 (8))                                     | LQC: 0.3-0.5 nM<br>HQC: 1.5-2.5 nM                           |

|                        |                                     |     |                                                         |               |            |                        |                                                  |
|------------------------|-------------------------------------|-----|---------------------------------------------------------|---------------|------------|------------------------|--------------------------------------------------|
| urine C1,2C            | Unknown                             | RUO | C-I                                                     | 1:2 (50 µl)   | 0.03 µg/ml | <0.06 µg/ml<br>(1 (1)) | LQC: 0.021-0.205 µg/mL<br>HQC: 0.753-1.317 µg/mL |
| urine C2C-HUSA<br>HUSA | Stable less than 24<br>hours at 4°C | RUO | Sandwich<br>assay                                       | Neat (100 µl) | 156 pg/ml  | <156 pg/mL<br>(4 (4))  | LQC: 223-463 pg/mL<br>HQC: 2866-3973 pg/mL       |
| urine CTXII            | Up to 7X freeze/thaw<br>cycles      | RUO | C-I                                                     | Neat (80 µl)  | 0.59 ng/ml | <0.59 ng/mL<br>(1 (1)) | LQC: 1.13-1.70 ng/mL<br>HQC: 3.19-4.78 ng/mL     |
| urine NTXI             | Up to 3X freeze/thaw<br>cycles      | IVD | C-I                                                     | Neat (100 µl) | 20 nM BCE  | <20 nM BCE<br>(1 (1))  | LQC: 350-464 nM BCE<br>HQC: 1146-1518 nM BCE     |
| urine CTX1α            | Up to 7X freeze/thaw<br>cycles      | RUO | C-I                                                     | 1:8 (12 µl)   | 0.30 ng/ml | <2.40 ng/mL<br>(2 (2)) | LQC: 12.54-18.82 ng/mL<br>HQC: 21.25-31.87 ng/mL |
| urine CTX-1β           | Up to 7X freeze/thaw<br>cycles      | IVD | C-I                                                     | 1:4 (20 µl)   | 1.37 ng/ml | <5.48 ng/mL<br>(1 (1)) | LQC: 9.0-13.5 ng/mL<br>HQC: 36.1-54.2 ng/mL      |
| Urine Creatinine       | Up to 4X freeze/thaw<br>cycles      | RUO | Colorimetric<br>based on<br>modified<br>Jaffe<br>method | 1:40 (2.5 µl) | 0          | 0 (0)                  | LQC: 6.0-7.9 mmol/L<br>HQC: 21.6-28.6 mmol/L     |

RUO=research use only; IVD=in vitro diagnostic (for osteoporosis); C-I= competitive-inhibition ELISA;

LLOQ=lower limit of quantification represented by the lowest standard;

The lowest reported value is the lowest assay standard times the starting sample dilution factor;

An extreme outlier was defined as a value above 5 times the interquartile range above the third quartile;

Neat=undiluted; C-I=competitive inhibition ELISA;

\*prior to creatinine normalization for urine markers

**Supplementary Table S2. Non-transformed concentrations of biomarkers for each group of the FNIH OA Biomarkers Consortium project.**

| Biomarker<br>(unit of<br>measure) | Cases (n=194)                                | Comparators<br>(n=406)                          | JSL+Pain<br>Progressors<br>(n=194)           | JSL only<br>Progressors<br>(n=103)           | Pain only<br>Progressors<br>(n=103)              | Non-<br>Progressors<br>(n=200)               |
|-----------------------------------|----------------------------------------------|-------------------------------------------------|----------------------------------------------|----------------------------------------------|--------------------------------------------------|----------------------------------------------|
|                                   | Mean (SD)<br>Median<br>(range)               | Mean (SD)<br>Median<br>(range)                  | Mean (SD)<br>Median<br>(range)               | Mean (SD)<br>Median<br>(range)               | Mean (SD)<br>Median<br>(range)                   | Mean (SD)<br>Median<br>(range)               |
| Serum C1,2C<br>(µg/ml)            | 0.39 (0.15)<br>0.38<br>(0.05-1.09)           | 0.38 (0.14)<br>0.37<br>(0.04-1.34)              | 0.39 (0.15)<br>0.38<br>(0.05-1.09)           | 0.38 (0.13)<br>0.37<br>(0.13-0.77)           | 0.38 (0.14)<br>0.38<br>(0.10-0.88)               | 0.38 (0.15)<br>0.37<br>(0.04-1.34)           |
| Serum C2C-<br>HUSA (ng/ml)        | 212.0 (54.9)<br>204.0<br>(102.0-423.0)       | 208.9 (46.8)<br>202.0<br>(100.0-<br>395.0)      | 212.0 (54.9)<br>204.0<br>(102.0-423.0)       | 208.6 (45.4)<br>203.0<br>(114.0-395.0)       | 207.3 (45.6)<br>202.0<br>(115.0-339.0)           | 209.9 (48.2)<br>201.0<br>(100.0-336.0)       |
| Serum COLL2-<br>1 NO2 (nM)        | 8.91 (4.99)<br>8.20<br>(0.00-37.98)          | 8.93 (5.45)<br>7.97<br>(0.00-45.17)             | 8.91 (4.99)<br>8.20<br>(0.00-37.98)          | 8.26 (3.90)<br>7.61<br>(0.00-21.85)          | 9.40 (6.69)<br>7.97<br>(0.42-45.17)              | 9.03 (5.41)<br>8.20<br>(0.00-43.08)          |
| Serum CPII<br>(ng/ml)             | 944.2 (363.2)<br>894.0<br>(204.0-<br>3006.0) | 945.7<br>(391.0)<br>889.0<br>(252.0-<br>4063.0) | 944.2 (363.2)<br>894.0<br>(204.0-<br>3006.0) | 869.4 (280.9)<br>849.0<br>(354.0-<br>2374.0) | 1015.8<br>(473.8)<br>961.0<br>(252.0-<br>3723.0) | 948.9 (387.3)<br>887.0<br>(283.0-<br>4063.0) |
| Serum CS846<br>(ng/ml)            | 79.2 (60.2)<br>65.0<br>(0.0-412.0)           | 76.8 (52.8)<br>66.0<br>(1.0-383.0)              | 79.2 (60.2)<br>65.0<br>(0.0-412.0)           | 67.8 (49.4)<br>55.0<br>(6.0-338.0)           | 79.5 (49.5)<br>73.5<br>(8.0-294.0)               | 80.1 (55.8)<br>69.0<br>(1.0-383.0)           |
| Serum CTXI<br>(ng/ml)             | 0.42 (0.21)<br>0.39<br>(0.07-1.23)           | 0.39 (0.22)<br>0.34<br>(0.08-1.79)              | 0.42 (0.21)<br>0.39<br>(0.07-1.23)           | 0.39 (0.20)<br>0.36<br>(0.09-1.10)           | 0.40 (0.26)<br>0.34<br>(0.11-1.79)               | 0.38 (0.21)<br>0.34<br>(0.08-1.33)           |
| Serum COMP<br>(ng/ml)             | 761.1 (280.1)<br>705.0<br>(168.0-<br>1903.0) | 783.4<br>(302.5)<br>739.0<br>(156.0-<br>2007.0) | 761.1 (280.1)<br>705.0<br>(168.0-<br>1903.0) | 777.4 (267.6)<br>743.5<br>(267.0-<br>1712.0) | 768.9 (290.5)<br>702.0<br>(219.0-<br>1526.0)     | 794.0 (325.4)<br>749.0<br>(156.0-<br>2007.0) |
| Serum HA<br>(ng/ml)               | 49.5 (36.5)<br>38.0<br>(4.0-193.0)           | 45.2 (40.2)<br>34.0<br>(3.0-297.0)              | 49.5 (36.5)<br>38.0<br>(4.0-193.0)           | 49.2 (33.7)<br>44.0<br>(5.0-172.0)           | 47.2 (54.1)<br>28.5<br>(4.0-297.0)               | 42.1 (34.5)<br>33.0<br>(3.0-213.0)           |
| Serum MMP-3                       | 17.5 (11.3)                                  | 16.9 (11.2)                                     | 17.5 (11.3)                                  | 19.4 (13.0)                                  | 16.2 (10.1)                                      | 16.0 (10.7)                                  |

|                                                                     |                                                     |                                                    |  |                                                     |                                                     |                                                    |                                                    |
|---------------------------------------------------------------------|-----------------------------------------------------|----------------------------------------------------|--|-----------------------------------------------------|-----------------------------------------------------|----------------------------------------------------|----------------------------------------------------|
| (ng/ml)                                                             | 14.4<br>(1.0-76.3)                                  | 14.6<br>(0.0-99.9)                                 |  | 14.4<br>(1.0-76.3)                                  | 16.3<br>(3.7-99.9)                                  | 13.9<br>(3.5-57.2)                                 | 14.0<br>(0.0-88.8)                                 |
| Serum NTXI<br>(nm BCE)                                              | 15.5 (4.9)<br>15.0<br>(4.0-28.0)                    | 14.8 (4.8)<br>14.0<br>(3.0-43.0)                   |  | 15.5 (4.9)<br>15.0<br>(4.0-28.0)                    | 14.8 (4.6)<br>14.0<br>(7.0-29.0)                    | 14.9 (4.6)<br>15.0<br>(6.0-32.0)                   | 14.8 (5.0)<br>14.0<br>(3.0-43.0)                   |
| Serum PIIANP<br>(ng/ml)                                             | 2581.1<br>(783.7)<br>2524.0<br>(781.0-<br>5219.0)   | 2677.2<br>(752.5)<br>2626.5<br>(160.0-<br>5656.0)  |  | 2581.1<br>(783.7)<br>2524.0<br>(781.0-<br>5219.0)   | 2550.0<br>(725.1)<br>2418.0<br>(780.0-<br>4256.0)   | 2644.3<br>(710.8)<br>2656.0<br>(1035.0-<br>4136.0) | 2759.7<br>(779.9)<br>2759.5<br>(160.0-<br>5656.0)  |
| Urine<br>Coll21NO2<br>creatinine<br>adjusted<br>(nM/mmol Cr)        | 0.025 (0.014)<br>0.021<br>(0.002-0.120)             | 0.024<br>(0.015)<br>0.020<br>(0.003-<br>0.108)     |  | 0.025 (0.014)<br>0.021<br>(0.002-0.120)             | 0.023 (0.014)<br>0.021<br>(0.005-0.108)             | 0.025 (0.018)<br>0.020<br>(0.006-0.105)            | 0.024 (0.015)<br>0.019<br>(0.003-0.103)            |
| Urine C1,2C<br>creatinine<br>adjusted<br>(ng/mmol Cr)               | 0.010 (0.011)<br>0.007<br>(0.000-0.045)             | 0.011<br>(0.011)<br>0.009<br>(0.000-<br>0.063)     |  | 0.010 (0.011)<br>0.007<br>(0.000-0.045)             | 0.012 (0.011)<br>0.010<br>(0.000-0.043)             | 0.013 (0.013)<br>0.011<br>(0.000-0.059)            | 0.010 (0.011)<br>0.007<br>(0.000-0.063)            |
| Urine C2C-<br>HUSA<br>creatinine<br>adjusted<br>(ng/mmol Cr)        | 165.6 (103.0)<br>149.1<br>(0.0-695.1)               | 152.7 (90.3)<br>137.9<br>(0.0-763.3)               |  | 165.6 (103.0)<br>149.1<br>(0.0-695.1)               | 161.4 (79.4)<br>150.4<br>(0.0-511.0)                | 161.5 (112.6)<br>137.8<br>(0.0-763.3)              | 143.8 (82.1)<br>133.4<br>(0.0-435.6)               |
| Urine CTXII<br>creatinine<br>adjusted<br>(ng/mmol Cr)               | 333.09<br>(210.53)<br>283.65<br>(59.38-<br>1446.38) | 287.69<br>(190.75)<br>233.55<br>(0.00-<br>1794.12) |  | 333.09<br>(210.53)<br>283.65<br>(59.38-<br>1446.38) | 313.51<br>(228.62)<br>256.36<br>(58.33-<br>1794.12) | 312.07<br>(211.06)<br>261.11<br>(0.00-<br>1240.00) | 261.84<br>(152.00)<br>222.41<br>(0.00-<br>1015.00) |
| Urine NTXI<br>creatinine<br>adjusted (nM<br>BCE/mmol Cr)            | 34.9 (16.6)<br>32.1<br>(8.6-116.4)                  | 32.6 (18.2)<br>29.1<br>(6.2-152.0)                 |  | 34.9 (16.6)<br>32.1<br>(8.6-116.4)                  | 31.3 (12.6)<br>29.4<br>(8.1-75.5)                   | 34.8 (21.8)<br>31.1<br>(9.1-152.0)                 | 32.1 (18.6)<br>28.4<br>(6.2-136.9)                 |
| Urine CTXI $\alpha$<br>creatinine<br>adjusted<br>( $\mu$ g/mmol Cr) | 0.46 (0.33)<br>0.39<br>(0.00-2.56)                  | 0.41 (0.33)<br>0.34<br>(0.00-2.76)                 |  | 0.46 (0.33)<br>0.39<br>(0.00-2.56)                  | 0.39 (0.24)<br>0.35<br>(0.00-1.13)                  | 0.43 (0.36)<br>0.34<br>(0.00-2.00)                 | 0.41 (0.35)<br>0.32<br>(0.00-2.76)                 |

|                                                                                   |                                    |                                     |                                    |                                    |                                    |                                     |
|-----------------------------------------------------------------------------------|------------------------------------|-------------------------------------|------------------------------------|------------------------------------|------------------------------------|-------------------------------------|
| Urine CTXII $\beta$<br>creatinine<br>adjusted<br>( $\mu\text{g}/\text{mmol Cr}$ ) | 2.34 (1.61)<br>2.04<br>(0.00-7.98) | 2.19 (1.67)<br>1.79<br>(0.00-11.08) | 2.34 (1.61)<br>2.04<br>(0.00-7.98) | 2.09 (1.42)<br>1.82<br>(0.00-7.14) | 2.29 (1.68)<br>1.89<br>(0.00-7.58) | 2.19 (1.78)<br>1.76<br>(0.00-11.08) |
|-----------------------------------------------------------------------------------|------------------------------------|-------------------------------------|------------------------------------|------------------------------------|------------------------------------|-------------------------------------|

JSL=joint space loss

**Supplementary Table S3. Correlations between baseline biomarkers and covariates.**

| Biomarker (z scored) | Sex*                                 | Pain Meds*                           | Race*                               | BL JSW <sup>+</sup>               | BL WOMAC<br>Pain <sup>+</sup>    | BL Age <sup>+</sup>                 | BL BMI <sup>+</sup>               |
|----------------------|--------------------------------------|--------------------------------------|-------------------------------------|-----------------------------------|----------------------------------|-------------------------------------|-----------------------------------|
| serum C1,2C          | <b>-0.2381</b><br><b>(&lt;.0001)</b> | 0.0325<br>(0.4219)                   | <b>0.3425</b><br><b>(0.0404)</b>    | 0.0455<br>(0.2659)                | -0.0347<br>(0.3960)              | 0.0552<br>(0.1773)                  | -0.0443<br>(0.2799)               |
| serum C2C-HUSA       | -0.1943<br>(0.4136)                  | <b>-0.1249</b><br><b>(0.0287)</b>    | <b>0.4799</b><br><b>(0.0133)</b>    | -0.0260<br>(0.5263)               | 0.0358<br>(0.3827)               | 0.0407<br>(0.3205)                  | 0.0710<br>(0.0830)                |
| serum COLL2-1 NO2    | -0.4379<br>(0.1856)                  | -0.1313<br>(0.1098)                  | <b>0.5757</b><br><b>(&lt;.0001)</b> | -0.0127<br>(0.7561)               | 0.0520<br>(0.2039)               | 0.0152<br>(0.7102)                  | -0.0622<br>(0.1288)               |
| serum CPII           | -0.2660<br>(0.5801)                  | <b>-0.0993</b><br><b>(&lt;.0001)</b> | <b>0.8107</b><br><b>(&lt;.0001)</b> | 0.0113<br>(0.7834)                | 0.0219<br>(0.5925)               | 0.0304<br>(0.4584)                  | -0.0342<br>(0.4048)               |
| serum CS846          | <b>-0.1095</b><br><b>(0.0093)</b>    | -0.0061<br>(0.6448)                  | 0.0202<br>(0.6321)                  | -0.0056<br>(0.8922)               | 0.0243<br>(0.5539)               | -0.0405<br>(0.3236)                 | 0.0167<br>(0.6835)                |
| serum CTXI           | <b>-0.1479</b><br><b>(&lt;.0001)</b> | 0.1160<br>(0.0541)                   | <b>-0.1441</b><br><b>(0.0310)</b>   | 0.0267<br>(0.5145)                | -0.0427<br>(0.2970)              | -0.0152<br>(0.7103)                 | <b>-0.1228</b><br><b>(0.0026)</b> |
| serum COMP           | 0.1317<br>(0.1167)                   | 0.0668<br>(0.7265)                   | 0.0987<br>(0.0950)                  | 0.0102<br>(0.8034)                | -0.0627<br>(0.1260)              | <b>0.2550</b><br><b>(&lt;.0001)</b> | -0.0620<br>(0.1307)               |
| serum HA             | 0.0010<br>(0.9821)                   | -0.0586<br>(0.4207)                  | <b>0.3268</b><br><b>(&lt;.0001)</b> | <b>-0.1007</b><br><b>(0.0138)</b> | -0.0109<br>(0.7899)              | <b>0.3829</b><br><b>(&lt;.0001)</b> | 0.0271<br>(0.5087)                |
| serum MMP-3          | <b>1.0617</b><br><b>(&lt;.0001)</b>  | -0.0067<br>(0.5986)                  | -0.1028<br>(0.1412)                 | 0.0295<br>(0.4727)                | -0.0684<br>(0.0953)              | <b>0.0850</b><br><b>(0.0381)</b>    | <b>-0.1057</b><br><b>(0.0098)</b> |
| serum NTXI           | <b>-0.1662</b><br><b>(0.0001)</b>    | 0.1850<br>(0.5795)                   | 0.0386<br>(0.1098)                  | 0.0081<br>(0.8424)                | -0.0054<br>(0.8961)              | 0.0538<br>(0.1886)                  | -0.0410<br>(0.3176)               |
| serum PIIANP         | -0.0377<br>(0.3946)                  | -0.0556<br>(0.5065)                  | 0.3650<br>(0.5638)                  | -0.0100<br>(0.8066)               | <b>0.0819</b><br><b>(0.0451)</b> | -0.0006<br>(0.9891)                 | <b>0.1517</b><br><b>(0.0002)</b>  |

|                     |                                      |                                      |                                      |                                   |                                   |                                     |                                   |
|---------------------|--------------------------------------|--------------------------------------|--------------------------------------|-----------------------------------|-----------------------------------|-------------------------------------|-----------------------------------|
| urine Col2-1 NO2    | <b>-0.2649</b><br><b>(0.0024)</b>    | <b>-0.2227</b><br><b>(&lt;.0001)</b> | <b>-0.2222</b><br><b>(&lt;.0001)</b> | 0.0167<br>(0.6836)                | -0.0018<br>(0.9659)               | 0.0312<br>(0.4456)                  | -0.0246<br>(0.5486)               |
| urine C1,2C         | <b>0.2664</b><br><b>(0.0127)</b>     | 0.0304<br>(0.6111)                   | -0.0416<br>(0.4939)                  | 0.0658<br>(0.1073)                | 0.0076<br>(0.8530)                | <b>-0.1090</b><br><b>(0.0075)</b>   | 0.0761<br>(0.0628)                |
| urine C2C-HUSA      | <b>-0.1548</b><br><b>(0.0031)</b>    | 0.0322<br>(0.6740)                   | <b>0.0083</b><br><b>(0.0035)</b>     | <b>-0.1006</b><br><b>(0.0138)</b> | <b>-0.0323</b><br><b>(0.4298)</b> | <b>0.2673</b><br><b>(&lt;.0001)</b> | -0.0400<br>(0.3284)               |
| urine CTXII         | <b>-0.2952</b><br><b>(&lt;.0001)</b> | 0.0477<br>(0.3227)                   | 0.1972<br>(0.1347)                   | -0.0621<br>(0.1287)               | <b>0.0805</b><br><b>(0.0488)</b>  | <b>0.1599</b><br><b>(&lt;.0001)</b> | 0.0584<br>(0.1533)                |
| urine NTXI          | <b>-0.4217</b><br><b>(&lt;.0001)</b> | <b>0.1724</b><br><b>(0.0006)</b>     | <b>-0.2061</b><br><b>(0.0029)</b>    | -0.0245<br>(0.5497)               | -0.0601<br>(0.1413)               | 0.0496<br>(0.2253)                  | <b>-0.1366</b><br><b>(0.0008)</b> |
| urine CTXI $\alpha$ | <b>-0.2870</b><br><b>(&lt;.0001)</b> | <b>0.1704</b><br><b>(0.0249)</b>     | -0.0413<br>(0.3738)                  | 0.0082<br>(0.8421)                | -0.0624<br>(0.1269)               | 0.0002<br>(0.9963)                  | <b>-0.0942</b><br><b>(0.0212)</b> |
| urine CTXI $\beta$  | <b>-0.3037</b><br><b>(&lt;.0001)</b> | 0.1817<br>(0.3298)                   | 0.0263<br>(0.5589)                   | 0.0282<br>(0.4904)                | -0.0260<br>(0.5259)               | -0.0599<br>(0.1431)                 | <b>-0.0887</b><br><b>(0.0300)</b> |

BL=baseline; Urine biomarkers normalized to creatinine; JSW=joint space width;

\*Difference in means (p-value) presented for dichotomous variables (presented as Sex: men - women; Medication use: no - yes; Race: nonwhite-white)

+Pearson correlation (p-value) presented for continuous variables

Values in bold represent associations that were significant at  $P \leq 0.05$

**Supplementary Table S4. Pearson correlations among baseline biomarker concentrations.**

| Biomarkers                     | sC1,2C  | sC2C-HUSA | sColl2-1NO2 | ssCPII  | sCS846  | sCTXI   | sCOMP   | sHA     | sMMP3   | sNTXI   | sPIIAMP | uColl2-1NO2/Cr | uC1,2C/Cr | uC2C-HUSA/Cr | uCTXII/Cr | uNTXI/Cr | uCTXI $\alpha$ /Cr | uCTXI $\beta$ /Cr |
|--------------------------------|---------|-----------|-------------|---------|---------|---------|---------|---------|---------|---------|---------|----------------|-----------|--------------|-----------|----------|--------------------|-------------------|
| Serum C1,2C                    | 1.0000  | 0.3930    | 0.3266      | 0.4854  | 0.0665  | 0.0231  | 0.0723  | 0.0539  | -0.0753 | -0.0504 | 0.0876  | 0.0495         | -0.0596   | 0.0689       | 0.0941    | 0.0301   | 0.0427             | 0.0152            |
| Serum C2C-HUSA                 | 0.3930  | 1.0000    | 0.2673      | 0.4391  | 0.0192  | -0.0128 | 0.1062  | 0.0874  | -0.1296 | -0.0647 | 0.1920  | -0.0679        | -0.0084   | 0.0685       | 0.1229    | 0.0141   | 0.0545             | 0.0154            |
| Serum COLL2-1NO2               | 0.3266  | 0.2673    | 1.0000      | 0.5059  | 0.0292  | 0.0026  | 0.0702  | 0.0236  | -0.0778 | 0.0490  | 0.0339  | -0.0055        | 0.0217    | 0.0533       | 0.0499    | -0.0009  | -0.0093            | -0.0145           |
| Serum CPII                     | 0.4854  | 0.4391    | 0.5059      | 1.0000  | -0.0208 | 0.0070  | 0.0590  | 0.0550  | -0.0959 | -0.0610 | 0.1390  | -0.0574        | -0.0622   | 0.0795       | 0.0925    | 0.0425   | 0.0527             | 0.0157            |
| Serum CS846                    | 0.0665  | 0.0192    | 0.0292      | -0.0208 | 1.0000  | 0.0864  | 0.0149  | -0.0051 | -0.0418 | 0.1549  | -0.0273 | -0.0122        | -0.0016   | -0.0019      | -0.0123   | 0.0748   | 0.0992             | 0.1125            |
| Serum CTXI                     | 0.0231  | -0.0128   | 0.0026      | 0.0070  | 0.0864  | 1.0000  | 0.0175  | 0.0609  | -0.0445 | 0.6558  | -0.0106 | 0.0571         | -0.0344   | 0.2649       | 0.3588    | 0.7750   | 0.7685             | 0.7611            |
| Serum Comp                     | 0.0723  | 0.1062    | 0.0702      | 0.0590  | 0.0149  | 0.0175  | 1.0000  | 0.2784  | 0.1560  | 0.0715  | 0.1018  | -0.0082        | 0.0287    | 0.1154       | 0.1065    | -0.0184  | -0.0140            | -0.0600           |
| Serum HA                       | 0.0539  | 0.0874    | 0.0236      | 0.0550  | -0.0051 | 0.0609  | 0.2784  | 1.0000  | 0.1239  | 0.0996  | 0.0353  | 0.0774         | -0.0178   | 0.2289       | 0.2505    | 0.0852   | 0.0510             | 0.0037            |
| Serum MMP-3                    | -0.0753 | -0.1296   | -0.0778     | -0.0959 | -0.0418 | -0.0445 | 0.1560  | 0.1239  | 1.0000  | 0.0154  | -0.0247 | -0.0412        | 0.0906    | -0.0669      | -0.1276   | -0.1513  | -0.1348            | -0.1320           |
| Serum NTXI                     | -0.0504 | -0.0647   | 0.0490      | -0.0610 | 0.1549  | 0.6558  | 0.0715  | 0.0996  | 0.0154  | 1.0000  | -0.0088 | -0.0110        | -0.0877   | 0.1720       | 0.3264    | 0.5569   | 0.5586             | 0.5205            |
| Serum PIIAMP                   | 0.0876  | 0.1920    | 0.0339      | 0.1390  | -0.0273 | -0.0106 | 0.1018  | 0.0353  | -0.0247 | -0.0088 | 1.0000  | -0.0985        | -0.0304   | 0.0175       | 0.0481    | -0.0287  | -0.0244            | -0.0227           |
| Urine Coll21NO2 creatinine adj | 0.0495  | -0.0679   | -0.0055     | -0.0574 | -0.0122 | 0.0571  | -0.0082 | 0.0774  | -0.0412 | -0.0110 | -0.0985 | 1.0000         | 0.2490    | 0.0090       | 0.0783    | 0.2181   | 0.0609             | 0.1244            |
| Urine C1,2C creatinine adj     | -0.0596 | -0.0084   | 0.0217      | -0.0622 | -0.0016 | -0.0344 | 0.0287  | -0.0178 | 0.0906  | -0.0877 | -0.0304 | 0.2490         | 1.0000    | -0.0221      | 0.0481    | 0.0390   | -0.0464            | 0.0861            |
| Urine C2C-HUSA creatinine adj  | 0.0689  | 0.0685    | 0.0533      | 0.0795  | -0.0019 | 0.2649  | 0.1154  | 0.2289  | -0.0669 | 0.1720  | 0.0175  | 0.0090         | -0.0221   | 1.0000       | 0.4970    | 0.3739   | 0.3459             | 0.2158            |
| Urine CTXII creatinine adj     | 0.0941  | 0.1229    | 0.0499      | 0.0925  | -0.0123 | 0.3588  | 0.1065  | 0.2505  | -0.1276 | 0.3264  | 0.0481  | 0.0783         | 0.0481    | 0.4970       | 1.0000    | 0.4346   | 0.3808             | 0.3634            |
| Urine NTXI creatinine adj      | 0.0301  | 0.0141    | -0.0009     | 0.0425  | 0.0748  | 0.7750  | -0.0184 | 0.0852  | -0.1513 | 0.5569  | -0.0287 | 0.2181         | 0.0390    | 0.3739       | 0.4346    | 1.0000   | 0.8907             | 0.8237            |

|                                   |        |        |         |        |        |        |             |        |             |        |             |        |         |        |        |        |        |        |
|-----------------------------------|--------|--------|---------|--------|--------|--------|-------------|--------|-------------|--------|-------------|--------|---------|--------|--------|--------|--------|--------|
| Urine CTX $\alpha$<br>Cr adjusted | 0.0427 | 0.0545 | -0.0093 | 0.0527 | 0.0992 | 0.7685 | -<br>0.0140 | 0.0510 | -<br>0.1348 | 0.5586 | -<br>0.0244 | 0.0609 | -0.0464 | 0.3459 | 0.3808 | 0.8907 | 1.0000 | 0.7760 |
| Urine CTX $\beta$<br>Cr adjusted  | 0.0152 | 0.0154 | -0.0145 | 0.0157 | 0.1125 | 0.7611 | -<br>0.0600 | 0.0037 | -<br>0.1320 | 0.5205 | -<br>0.0227 | 0.1244 | 0.0861  | 0.2158 | 0.3634 | 0.8237 | 0.7760 | 1.0000 |



**Supplementary Table S5. Performance of 24M TIC continuous biomarkers (10-fold Cross Validated).**

| Mechanism             | Biomarker           | p-value (unadj) | Adjusted |            |         | AUC         |           |             | IDI    | NRI    |
|-----------------------|---------------------|-----------------|----------|------------|---------|-------------|-----------|-------------|--------|--------|
|                       |                     |                 | OR       | OR 95% CI  | p-value | base model* | new model | differ-ence |        |        |
| Bone Resorption       | Serum CTXI          | 0.0097          | 1.28     | 1.08, 1.53 | 0.0051  | 0.550       | 0.576     | 0.026       | 0.0103 | 0.2406 |
| Inflammation          | Serum HA            | 0.0281          | 1.22     | 1.01, 1.48 | 0.0415  | 0.551       | 0.566     | 0.015       | 0.0052 | 0.2060 |
| Bone Resorption       | Serum NTXI          | 0.0202          | 1.25     | 1.05, 1.48 | 0.0131  | 0.551       | 0.572     | 0.021       | 0.0074 | 0.1081 |
| Bone Resorption       | Urine CTX-1a        | 0.0052          | 1.32     | 1.11, 1.58 | 0.002   | 0.550       | 0.586     | 0.036       | 0.0129 | 0.2446 |
| Bone Resorption       | Urine CTX-1 $\beta$ | 0.0298          | 1.27     | 1.06, 1.51 | 0.0086  | 0.550       | 0.573     | 0.024       | 0.0094 | 0.1029 |
| Cartilage Degradation | Urine C2C-HUSA      | 0.0078          | 1.27     | 1.06, 1.53 | 0.0108  | 0.550       | 0.568     | 0.019       | 0.0077 | 0.1639 |
| Cartilage Degradation | Urinary CTXII       | 0.0016          | 1.37     | 1.15, 1.65 | 0.0006  | 0.550       | 0.587     | 0.037       | 0.0152 | 0.2487 |
| Bone Resorption       | Urine NTXI          | 0.017           | 1.29     | 1.08, 1.54 | 0.0057  | 0.550       | 0.580     | 0.030       | 0.0101 | 0.1226 |

AUC=area under curve; NRI=net reclassification index; IDI=integrated discrimination improvement; TIC=time integrated concentration  
Urine markers are creatinine adjusted.

\* Base model includes age, sex, race, BMI, baseline joint space width, baseline (WOMAC) pain, baseline Kellgren-Lawrence grade, pain medication use

**Supplementary Table S6. Cut-offs used for creating categorical variables in combinatorial models to predict case status (based on 24M TICs for final models shown in Table 5).**

| Biomarker                                        | n   | Z-score related     |      |      | Raw concentration related* |         |        |        |
|--------------------------------------------------|-----|---------------------|------|------|----------------------------|---------|--------|--------|
|                                                  |     | cut-off             | min  | max  | min                        | max     | mean   | std    |
| serum CTXI 24M TIC                               | 447 | $z \leq 0.5$        | -1.7 | 0.5  | 0.15                       | 0.97    | 0.62   | 0.20   |
|                                                  | 151 | $z > 0.5$           | 0.5  | 4.0  | 0.97                       | 2.26    | 1.29   | 0.31   |
| serum HA 24M TIC                                 | 221 | $z \leq -0.5$       | -1.3 | -0.5 | 5                          | 62      | 41.9   | 13.0   |
|                                                  | 298 | $-0.5 < z \leq 1$   | -0.5 | 1.0  | 62.5                       | 164.5   | 102.1  | 28.6   |
|                                                  | 76  | $z > 1$             | 1.0  | 6.3  | 166                        | 526     | 234.6  | 71.6   |
| serum NTXI 24M TIC                               | 511 | $z \leq 1$          | -2.4 | 0.9  | 7.5                        | 38.5    | 27.1   | 6.1    |
|                                                  | 86  | $z > 1$             | 1.0  | 5.9  | 39                         | 84      | 46.1   | 7.3    |
| urine CTXI $\alpha$ 24M TIC<br>creatinine adj    | 212 | $z \leq -0.5$       | -1.4 | -0.5 | 0.00                       | 0.53    | 0.33   | 0.14   |
|                                                  | 253 | $-0.5 < z \leq 0.5$ | -0.5 | 0.5  | 0.54                       | 1.12    | 0.81   | 0.17   |
|                                                  | 133 | $z > 0.5$           | 0.5  | 7.4  | 1.13                       | 5.10    | 1.65   | 0.60   |
| urine C2C-HUSA<br>24M TIC creatinine<br>adj 24M  | 197 | $z \leq -0.5$       | -1.9 | -0.5 | 0.00                       | 235.74  | 164.14 | 51.44  |
|                                                  | 318 | $-0.5 < z \leq 1$   | -0.5 | 1.0  | 236.88                     | 479.97  | 335.95 | 67.63  |
|                                                  | 83  | $z > 1$             | 1.0  | 7.7  | 483.07                     | 1574.52 | 615.03 | 157.44 |
| urine CTXI $\beta$ 24M TIC<br>creatinine adj 24M | 78  | $z \leq -1$         | -1.7 | -1.0 | 48.9011                    | 279.420 | 220.10 | 50.98  |
|                                                  | 151 | $-1 < z \leq -0.5$  | -1.0 | -0.5 | 282.893                    | 449.236 | 369.17 | 47.95  |
|                                                  | 370 | $z > -0.5$          | -0.5 | 5.1  | 451.199                    | 2352.91 | 807.56 | 303.22 |
| urine NTXI 24M TIC<br>creatinine adj 24M         | 206 | $z \leq -0.5$       | -1.8 | -0.5 | 12.62                      | 50.92   | 39.06  | 8.49   |
|                                                  | 312 | $-0.5 < z \leq 1$   | -0.5 | 1.0  | 51.05                      | 95.41   | 69.09  | 11.82  |
|                                                  | 81  | $z > 1$             | 1.0  | 6.4  | 96.07                      | 254.29  | 121.61 | 28.38  |

\* serum CTXI, HA and PIIANP in ng/ml; serum NTXI in nm BCE; urine CTXI $\alpha$  and CTXI $\beta$  in  $\mu$ g/mmol Cr; urine C2C-HUSA and CTIXII in ng/mmol Cr; urine NTXI in nM BCE/mmol Cr

**Supplementary Table S7. Hierarchical models for urine biomarkers (based on 24M TICs).**

|                                      | Model 1:       | Model 2:              | Model 3:                          | Model 4:                                          | Model 5:                              |
|--------------------------------------|----------------|-----------------------|-----------------------------------|---------------------------------------------------|---------------------------------------|
|                                      | UR-CTXII only  | UR-CTXII,<br>UR-ALPHA | UR-CTXII,<br>UR-ALPHA,<br>UR-NTXI | UR-CTXII,<br>UR-ALPHA,<br>UR-NTXI,<br>UR-C2C-HUSA | UR-CTXII,<br>UR-ALPHA,<br>UR-C2C-HUSA |
| C-statistic (AUC)*                   | 0.583          | 0.609                 | 0.611                             | 0.618                                             | 0.617                                 |
| UR-CTXII                             | p=0.0006       | p=0.0126              | p=0.0149                          | p=0.0930                                          | p=0.0884                              |
| $z < -1$ vs. $-1 \leq z < -0.5$      | 0.5 (0.2, 0.9) | 0.5 (0.2, 1.0)        | 0.5 (0.2, 1.0)                    | 0.5 (0.3, 1.1)                                    | 0.5 (0.3, 1.1)                        |
| $z \geq -0.5$ vs. $-1 \leq z < -0.5$ | 1.5 (1.0, 2.3) | 1.3 (0.9, 2.1)        | 1.3 (0.9, 2.1)                    | 1.2 (0.8, 1.9)                                    | 1.2 (0.8, 1.9)                        |
| UR-ALPHA                             |                | p=0.1108              | p=0.4129                          | p=0.4165                                          | p=0.1331                              |
| $z < -0.5$ vs. $-0.5 \leq z < 0.5$   |                | 0.8 (0.5, 1.2)        | 0.8 (0.5, 1.4)                    | 0.8 (0.5, 1.3)                                    | 0.8 (0.5, 1.2)                        |
| $z \geq 0.5$ vs. $-0.5 \leq z < 0.5$ |                | 1.3 (0.9, 2.0)        | 1.3 (0.7, 2.3)                    | 1.3 (0.7, 2.2)                                    | 1.3 (0.8, 2.0)                        |
| UR-NTXI                              |                |                       | p=0.9802                          | p=0.9898                                          |                                       |
| $z < -0.5$ vs. $-0.5 \leq z < 1$     |                |                       | 1.0 (0.6, 1.6)                    | 1.0 (0.6, 1.6)                                    |                                       |
| $z \geq 1$ vs. $-0.5 \leq z < 1$     |                |                       | 1.0 (0.5, 1.9)                    | 1.0 (0.5, 1.9)                                    |                                       |
| UR-C2C-HUSA                          |                |                       |                                   | p=0.5628                                          | p=0.5575                              |
| $z < -0.5$ vs. $-0.5 \leq z < 1$     |                |                       |                                   | 0.8 (0.5, 1.3)                                    | 0.8 (0.5, 1.3)                        |
| $z \geq 1$ vs. $-0.5 \leq z < 1$     |                |                       |                                   | 1.1 (0.7, 1.9)                                    | 1.1 (0.7, 1.8)                        |

C-Statistics (AUCs) not cross validated; UR=urine; None of the urine markers are statistically significant when added in addition to Urine-CTXII.

**Supplementary Table S8. Hierarchical models for baseline biomarkers predicting case status at 48M.**

|                                      | Model 1:       | Model 2:              | Model 3:             | Model 4:              | Model 4:               | Model 6:                           |
|--------------------------------------|----------------|-----------------------|----------------------|-----------------------|------------------------|------------------------------------|
|                                      | UR-CTXII only  | UR-CTXII,<br>UR-ALPHA | UR-CTXII,<br>UR-NTXI | UR-CTXII,<br>SER-NTXI | UR-CTXII,<br>SER-CTXI, | UR-CTXII,<br>UR-ALPHA,<br>SER-NTXI |
| C-statistic (AUC)*                   | 0.563          | 0.577                 | 0.573                | 0.586                 | 0.576                  | 0.588                              |
| UR-CTXII                             | p=0.0065       | p=0.0185              | p=0.0144             | p=0.0136              | p=0.0145               | p=0.0226                           |
| $z < -1$ vs. $-1 \leq z < -0.5$      | 0.4 (0.2, 1.0) | 0.4 (0.2, 1.0)        | 0.4 (0.2, 1.0)       | 0.4 (0.2, 1.0)        | 0.4 (0.2, 1.0)         | 0.4 (0.2, 1.0)                     |
| $z \geq -0.5$ vs. $-1 \leq z < -0.5$ | 1.4 (0.9, 2.1) | 1.3 (0.9, 2.0)        | 1.3 (0.9, 2.0)       | 1.4 (0.9, 2.1)        | 1.4 (0.9, 2.1)         | 1.3 (0.9, 2.0)                     |
| UR-ALPHA                             |                | p=0.1443              |                      |                       |                        | p=0.4012                           |
| $z \geq 0.5$ vs. $z < 0.5$           |                | 1.4 (0.9, 2.1)        |                      |                       |                        | 1.2 (0.8, 1.9)                     |
| UR-NTXI                              |                |                       | p=0.3713             |                       |                        |                                    |
| $z \geq 0.5$ vs. $z < 0.5$           |                |                       | 1.2 (0.8, 1.8)       |                       |                        |                                    |
| SER-NTXI                             |                |                       |                      | p=0.0394              |                        | p=0.0889                           |
| $z \geq 1$ vs. $z < 1$               |                |                       |                      | 1.6 (1.0, 2.5)        |                        | 1.5 (0.9, 2.4)                     |
| SER-CTXI                             |                |                       |                      |                       | p=0.4667               |                                    |
| $z < -0.5$ vs. $-0.5 \leq z < 0.5$   |                |                       |                      |                       | 1.0 (0.7, 1.5)         |                                    |
| $z \geq 0.5$ vs. $-0.5 \leq z < 0.5$ |                |                       |                      |                       | 1.3 (0.8, 2.0)         |                                    |

\* C-Statistics (AUCs) not cross validated; ur=urine; ser=serum

# Supplementary Text for "Predictive Validity of Biochemical Biomarkers in Knee Osteoarthritis – Data from the FNIH Biomarkers Consortium" (Kraus et al.)

## PATIENTS AND METHODS

### *Study Design*

In brief, eligible participants for the present study were those with at least one knee with a Kellgren-Lawrence grade (KLG) of 1-3 at baseline from central reading and availability at baseline and 24M of medial joint space width data from knee radiographs, knee magnetic resonance images (MRI), stored serum and urine specimens and clinical data. Participants with knee or hip replacement between baseline and 24M were excluded to avoid potential effects of this surgery on systemic biomarker levels. Participants were also excluded if they had radiographic and pain progression by 12M follow-up. Knees were excluded that had lateral joint space narrowing (JSN) grade 2 or 3 at baseline.

### *Definitions of radiographic and symptomatic progression*

Radiographic progression was defined by loss of minimum JSW in the medial compartment of  $\geq 0.7$  mm from baseline to 24, 36 or 48M from radiographs obtained by non-fluoroscopic fixed flexion protocol (SynaFlexor, Synarc, Newark, CA)[1]. Knee pain was assessed using the Western Ontario McMasters (WOMAC) pain subscale[2]. Based upon an established minimum clinically important difference (MCID) for pain worsening[3], persistent pain progression was defined as a pain increase of  $\geq 9$  points at 2 or more timepoints (on a 0-100 normalized score, 100=worst) from the 24M to 60M pain assessment.

For better covariate balance among the groups, the knees selected for the four groups were frequency matched to the extent feasible, using KLG strata 1-3 and body mass index (BMI) strata <25, 25-27.5, 27.5-30, 30-35 and  $\geq 35$  kg/m<sup>2</sup>.

### *Biospecimen Collection*

Serum (s) and urine (u, unspun) were obtained at baseline, 12M and 24M. By design, all subjects had baseline and 24M samples. A total of 15 subjects lacked 12M data and samples. Overall a total of N=1,785 specimens from 600 subjects were available for analysis. The majority of subjects provided fasting blood and urine samples (defined as more than 8 hours without food prior to specimen collection); the proportions of fasting samples at baseline, 12M and 24M were 98%, 96% and 98%, respectively for serum, and 92%, 93% and 94%, respectively for urine. Biospecimens were provided from the OAI sample repository by Fisher Scientific. Encoded and unthawed stock samples of serum (0.5 ml x 2 aliquots) and urine (2 ml aliquot) were provided to LabCorp Clinical Trials (San Leandro, CA) for these analyses. The stock urine sample was aliquoted by LabCorp and an aliquot provided to Artialis (Liege, Belgium) for their analysis of urine Col2-1 NO2. All biospecimens were encoded by personnel at the study's data coordinating center at UCSF (the data and sample supervising institution). The two analytic sites were provided knowledge of the clustering of samples by individual in order to run all samples for a particular individual on the same assay plate and thereby minimize within subject technical variability. Both sites were blinded to the timing (baseline, 12M, 24M) of specimens. The biomarker data were forwarded to UCSF for unblinding and linking to the clinical data for subsequent analysis by personnel at the central statistical analysis center (Brigham and Women's Hospital).

## *Biomarker Assays*

As part of the recommendations to advance the science of biomarkers, the OARSI / FDA Biomarkers Working Group[4] recommended measurement of a broad set of biomarkers in the same sample set. By consensus of the 20 authors, the following commercially available biomarkers, were recommended for inclusion in a future study to provide comparative data and biological insights from which to continue to assess the utility and relevance of an array of established OA-related biomarkers: urinary CTX-II, serum COMP, serum hyaluronan, serum and urine C1, 2C, serum and urine C2C, serum and urine Coll2-1 and Coll2-1NO2, serum CPII, Serum PIIANP, urine/serum NTX-1, urine/ serum CTX-1, serum CS846, and serum MMP-3. This panel was considered an initial starting point for a process of OA biomarker qualification in evolution. In addition, to be selected for study, the biomarker had to be available “off the shelf” as a commercially available kit, and available world-wide. Each of these biomarkers met this criterion and therefore this entire list was chosen for the initial phase I analysis of the FNIH OA Biomarker Consortium study. This does not imply that they necessarily represent the sole or best possibilities for fulfilling the needs of the OA drug development process. Formal biomarker qualification is acknowledged to be an arduous and dynamic process, benefitting from an advancing base of knowledge to expand and refine the contexts for which biomarkers are formally qualified. However, this study is important for establishing a paradigm by which OA-related biomarker qualification can proceed. The sequencing of assays was deliberately designed and standardized after discussion with each kit manufacturer, to minimize freeze thaws and prioritize analyses of known labile biomarkers and those for which freeze-thaw stability was unknown (Supplementary Table 1). Great care was taken to use kits with the same lot number for all sample analyses of each particular biomarker. Inter-assay coefficients of variation (CVs, provided in Table 1) are based on the average CVs of high and low concentration control samples provided with each kit and run on each plate; when available (as for serum MMP-3 and HA), a third medium concentration standard was also run on each plate and combined with the high and low concentrations for an overall CV. All samples were run in duplicate. The initial dilutions for sample measurements (listed in Supplementary Table 1) were agreed upon by the kit manufacturers. Samples with concentrations above the highest standard

were repeated at a higher dilution until results were within the linear range of the assay; thus all high values were quantifiable. When biomarker results were below the lowest standard, the kit manufacturer was consulted to determine lower dilutions that could be tested without the likelihood of incurring problems with assay inhibition. For many of the biomarkers, there were still appreciable numbers of samples with values below the LLOQ. Several imputation strategies were considered. For the purposes of these analyses, concentrations below the lower limits of detection were imputed by interpolation from the standard curve extended from the lowest standard to zero. This was deemed superior to random imputation, particularly for biomarkers, such as HA and CS846 whose standard curves were clearly linear below the lowest standard (data not shown). For Col2-1 NO2, concentrations below LLOQ were imputed as 80% of the lowest standard. Both of these methods are variations on the single imputation method for dealing with values below the lower limit of detection[5]. For each biomarker and visit we identified extreme outliers. Typically, an outlier is defined as an observation more than 1.5 times the interquartile range (IQR) above the third quartile or above the first quartile[6]. To identify extreme outliers, we identified those observations that were >5 times the IQR above the third quartile, or >3 times the IQR above the third quartile when the biomarker was transposed to the log scale. These observations were excluded from the main analysis. As a sensitivity analysis, we imputed the extreme outliers with the maximum value of the non-excluded observations for each biomarker/time point.

### *Statistical analysis*

We conducted the analysis in several steps. First, we evaluated each biomarker separately, using a logistic regression model, after adjusting for age, sex, BMI, baseline radiographic joint space narrowing, baseline WOMAC pain and baseline use of pain medications. For each biomarker, we assessed the p-value (those with  $p < 0.1$  were advanced to multivariable modeling) and discriminative ability using the c-statistic (AUC), category-less net reclassification index (NRI), and the integrated discrimination improvement (IDI) index. The additional discriminative indices were used for confirmatory purposes and the



p-value served as a main determinant of significance. Ten-fold cross validation was used to assess the prediction error; this process was repeated 100 times to generate a range for each cross-validated measure of discrimination. We also examined cross correlation among biochemical markers to avoid issues of collinearity.

Second, for each biomarker selected on the basis of p-value, we created a 5-level categorical variable to evaluate the dose-response relationship between the biomarker and risk of case status. Categories were based on z-score-based deviation from the mean. To improve the statistical power, categories were combined based on intermediary analysis if adjacent categories exhibited similar relationship with the outcome.

Third, we further reduced the data by selecting among the correlated markers ( $r \geq 0.80$ ), those that showed the best discriminative ability, based on the combination of c-statistics (AUCs), NRI, IDI. We evaluated both the continuous and categorical biomarkers in this step. We conducted a number of sensitivity analyses to confirm that the selection process did not affect the performance of the final model.

Finally, we conducted multivariable analyses. Based on univariable results from the primary analyses, we selected biomarkers to advance to multivariable modeling. We built models in a hierarchical fashion, with the best performing biomarkers added to the model first (performance based on p-value, OR, IDI, AUC, NRI as described above). The added predictive ability of each new biomarker was assessed by the p-value and OR of the newly added marker in the multivariable model. The biomarkers with adjusted p-values  $> 0.1$  were eliminated from the final models. All multivariable models were adjusted for age, sex, BMI, baseline radiographic joint space narrowing, baseline WOMAC pain and baseline use of pain medications. To improve the transparency of results and interpretation, we present three sets of best models: urine biomarkers only, serum biomarkers only and models based on the combination of serum

and urine biomarkers. We repeated the ten-fold cross validation process for the final models. Multivariable modeling was done only for the primary analysis of pain and radiographic joint space loss progression versus comparator knees lacking the combination of pain and radiographic progression and only for 24M TIC and baseline biomarker concentrations.

### *Sensitivity Analysis for Outliers*

In total, out of 33,915 measurements, we excluded 61 extreme outliers for 35 participants. The results of the analysis remained largely the same when we imputed the maximum of the non-extreme outlier values for each extreme outlier. The main difference in the sensitivity analysis was that the 24 month TIC for serum-HA no longer met the  $p < 0.10$  threshold in unadjusted analysis ( $p = 0.14$ ). There were three controls with extreme values of serum-HA that were excluded from the main analysis; including these participants narrowed the difference between the cases and controls (z-scores for controls vs. cases of -0.06 vs. 0.13 in original analysis and -0.04 vs. 0.09 in sensitivity analysis) while simultaneously increasing the variability around the serum HA measurement.

### *Biomarker characteristics*

The biomarker concentrations for cases and comparators in the primary analysis (two groups) are provided in Table 1. Non-transformed concentrations based on further stratification by four groups (three progressor and one non-progressor) are provided in Supplementary Table 2. Associations between each biomarker under consideration and set of person-based baseline characteristics (age, sex, BMI, baseline radiographic joint space narrowing, baseline WOMAC pain and baseline use of pain medications) are presented in Supplementary Table 3. Correlations among all the biomarkers are presented in

Supplementary Table 4. The only collinear biomarker (Pearson  $r > 0.8$ ) was uNTXI that correlated with both uCTXI $\alpha$  and uCTXI $\beta$ . There were also strong correlations ( $r > 0.75$ ) between sCTXI and uNTXI, uCTXI $\alpha$  and uCTXI $\beta$  and between uCTXI $\alpha$  and uCTXI $\beta$ . The strongest correlation for uCTXII was with the other collagen type II degradation marker, uC2C ( $r = 0.50$ ); uCTXII was also modestly correlated with the collagen type I degradation biomarkers ( $r = 0.33-0.43$ ).

## REFERENCES

1. Peterfy C, Li J, Saim S, et al. Comparison of fixed-flexion positioning with fluoroscopic semi-flexed positioning for quantifying radiographic joint-space width in the knee: test-retest reproducibility. *Skeletal Radiol* 2003;32:128-132.
2. Bellamy N, Buchanan WW, Goldsmith CH, et al. Validation study of WOMAC: a health status instrument for measuring clinically important patient relevant outcomes to antirheumatic drug therapy in patients with osteoarthritis of the hip or knee. *J Rheumatol* 1988;15(12):1833-1840.
3. Angst F, Aeschlimann A, Stucki G. Smallest detectable and minimal clinically important differences of rehabilitation intervention with their implications for required sample sizes using WOMAC and SF-36 quality of life measurement instruments in patients with osteoarthritis of the lower extremities. *Arthritis Rheum* 2001;45(4):384-391.
4. Kraus VB, Burnett B, Coindreau J, et al. Application of biomarkers in the development of drugs intended for the treatment of osteoarthritis. *Osteoarthritis Cartilage* 2011;19(5):515-542.
5. Vexler A, Tao G, Chen X. A toolkit for clinical statisticians to fix problems based on biomarker measurements subject to instrumental limitations: from repeated measurement techniques to a hybrid pooled-unpooled design. *Methods Mol Biol* 2015;1208:439-460.
6. Moore D, McCabe G. Introduction to the Practice of Statistics. 3rd ed. New York: W. H. Freeman, 1999.
